# Supplementary material for: Artificial neural networks for short-term forecasting of cases, deaths, and hospital beds occupancy in the COVID-19 pandemic at the Brazilian Amazon
Source: PubMed Central journal article supplement (PMC7951831; doi:10.1371/journal.pone.0248161), 2021-03-11
Supplement: pone.0248161.s007.pdf [file pone.0248161.s007.pdf]

## Certificate of Translation

On behalf of the Voluntary Translation of Informative Materials related to COVID-19 Project at the Federal University of Bahia, we inform that the research article “**Artificial neural networks for short-term forecasting of cases, deaths, and hospital beds occupancy in the COVID-19 pandemic at the Brazilian Amazon**” was translated into English by our team of training translators. We also inform that, as it is a pedagogic project, the text was closely supervised and revised by the professors responsible for the project.

November 27 2020  
Salvador - Bahia - Brazil  
Universidade Federal da Bahia



Prof. Dr. Monique Pfau

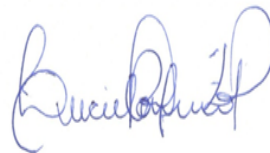

Prof. Dr. Lucielen Porfirio



Prof. Me. Daniel Vasconcelos B. Oliveira



Prof. Dr. Feibriss Henrique Meneghelli  
Cassilhas
